# Supplementary material
Source: publisher figshare collection journal article supplement (https://acs.figshare.com/ndownloader/files/4192780)
Supplement: Supplementary file 1 [file 4192780]

# Gas Adsorption Mechanism and Kinetics of an Elastic Layer-Structured Metal-Organic Framework

*Atsushi Kondo,<sup>†\*</sup> Natsuko Kojima,<sup>§</sup> Hiroshi Kajiro,<sup>‡</sup> Hiroshi Noguchi,<sup>§</sup> Yoshiyuki*

*Hattori,<sup>¶</sup> Fujio Okino,<sup>¶</sup> Kazuyuki Maeda,<sup>†</sup> Tomonori Ohba,<sup>§</sup> Katsumi Kaneko,<sup>||</sup>*

*Hirofumi Kanoh<sup>§\*</sup>*

<sup>†</sup>Department of Applied Chemistry, Tokyo University of Agriculture and Technology,

2-24-16 Koganei, Naka-cho 184-8588, Japan, <sup>§</sup> Graduate School of Science, Chiba

University, Yayoi, Inage, Chiba 263-8522, Japan, <sup>‡</sup> Nippon Steel Corporation, Shintomi,

Futtsu, Chiba 293-8511, Japan, <sup>¶</sup> Department of Chemistry, Faculty of Textile Science

and Technology, Shinshu University, Ueda 386-8567, Japan, <sup>||</sup> Research Center for

Exotic Nanocarbons (JST), Shinshu University, 4-17-1 Wakasato, Nagano 380-8553,

Japan.

### Simulation details

For Grand Canonical Monte Carlo simulation, potential parameters of ELM-11 were taken from the universal force field. Here the potential parameters of collision diameters  $\sigma$  and potential well depths  $\varepsilon$  are as follows. Each element is indicated by a subscript:  $\sigma_C = 0.375$  nm,  $\varepsilon_C / k_B = 55.36$  K,  $\sigma_F = 0.300$  nm,  $\varepsilon_F / k_B = 34.22$  K,  $\sigma_N = 0.325$  nm,  $\varepsilon_N / k_B = 85.56$  K,  $\sigma_{Cu} = 0.257$  nm, and  $\varepsilon_{Cu} / k_B = 5.888$  K. The partial charges of the C atoms in a bipyridine molecule are +0.09 ( $C_a$  carbon atoms), -0.030 ( $C_b$  carbon atoms) and +0.230 ( $C_c$  carbon atoms) e (Figure 1S). The partial charges of B, F, N, and Cu atoms are +0.976, -0.494, -0.490, and +2.000 e, respectively.

A three-centered Lennard-Jones potential model with three partial charges was used as  $CO_2$  potential model. In this model, the Lennard-Jones parameters of a C atom are  $\sigma_c = 0.2753$  nm and  $\varepsilon_c / k_B = 29.07$  K, respectively, and those of an O atom are  $\sigma_o = 0.3029$  nm and  $\varepsilon_o / k_B = 83.2$  K, respectively. The partial charges of the C and O atoms in  $CO_2$  molecules are +0.6466 and -0.3233 e, respectively. The atomic distance between C and O atoms in  $CO_2$  molecules is 0.1143 nm.

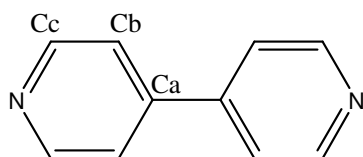

Fig 1S. Labeling of carbon atoms in a 4,4'-bipyridine molecule.

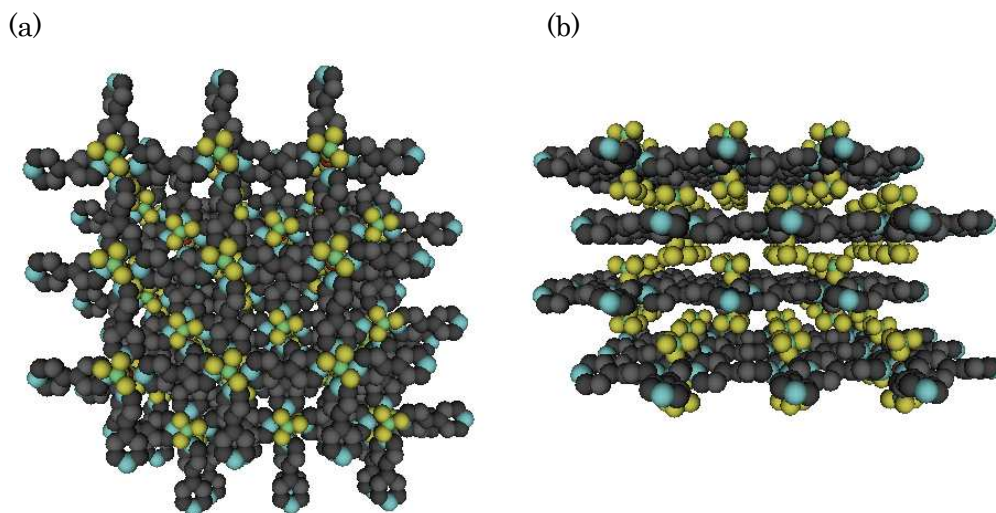

Figure 2S. Schematic representations of ELM-11 used for Grand Canonical Monte Carlo simulation. (a) Top view and (b) side view of the model. (Copper: Red, Carbon: Gray, Nitrogen: Blue, Boron: Green, Fluorine: Yellow.)

(a)

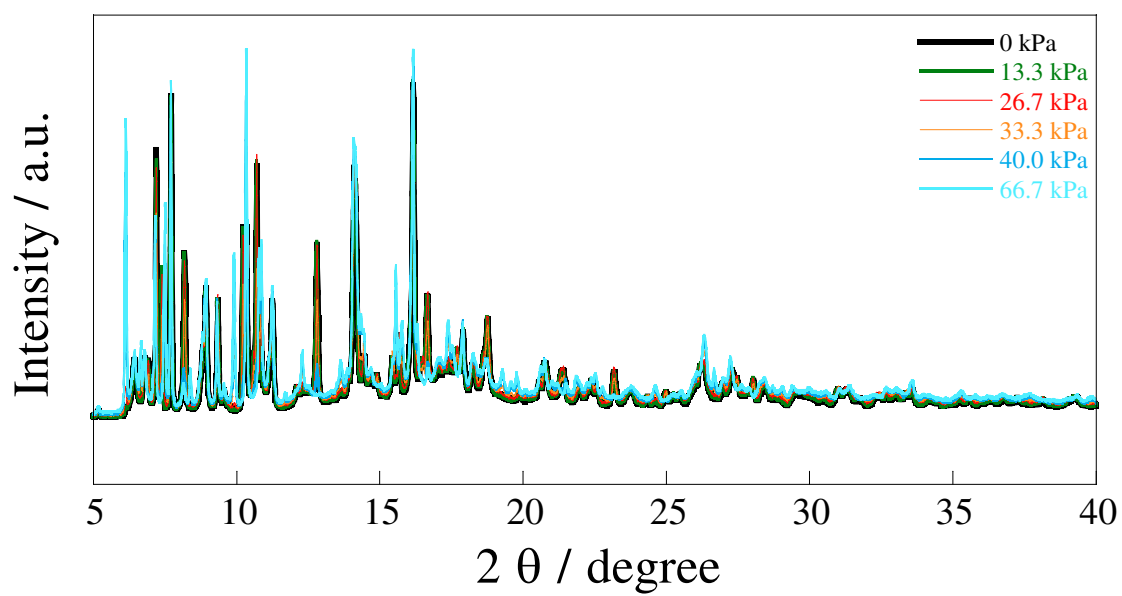

(b)

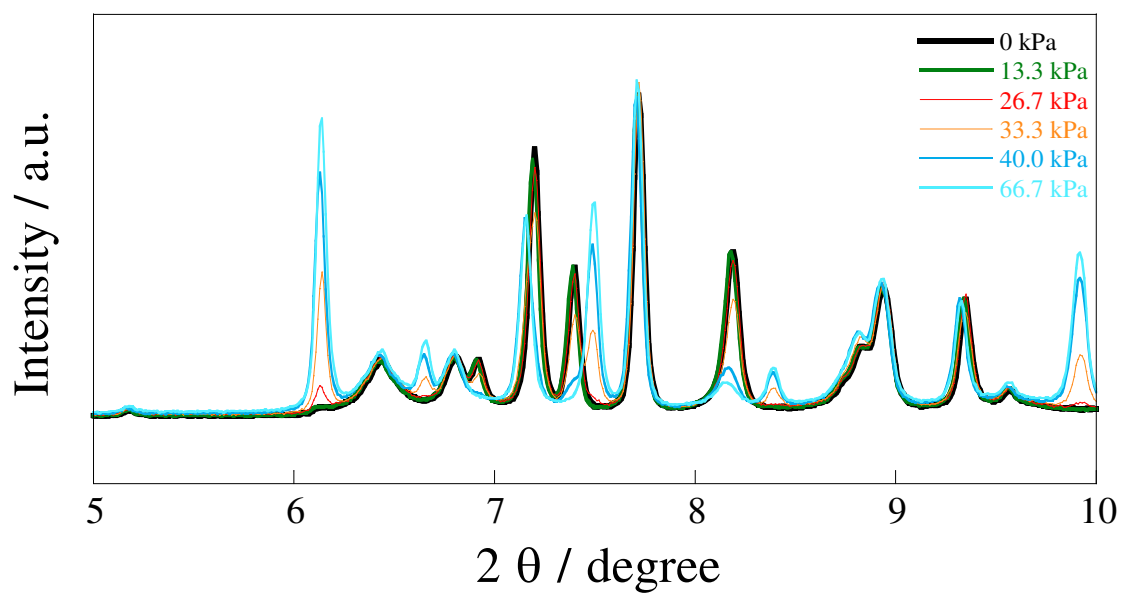

(c)

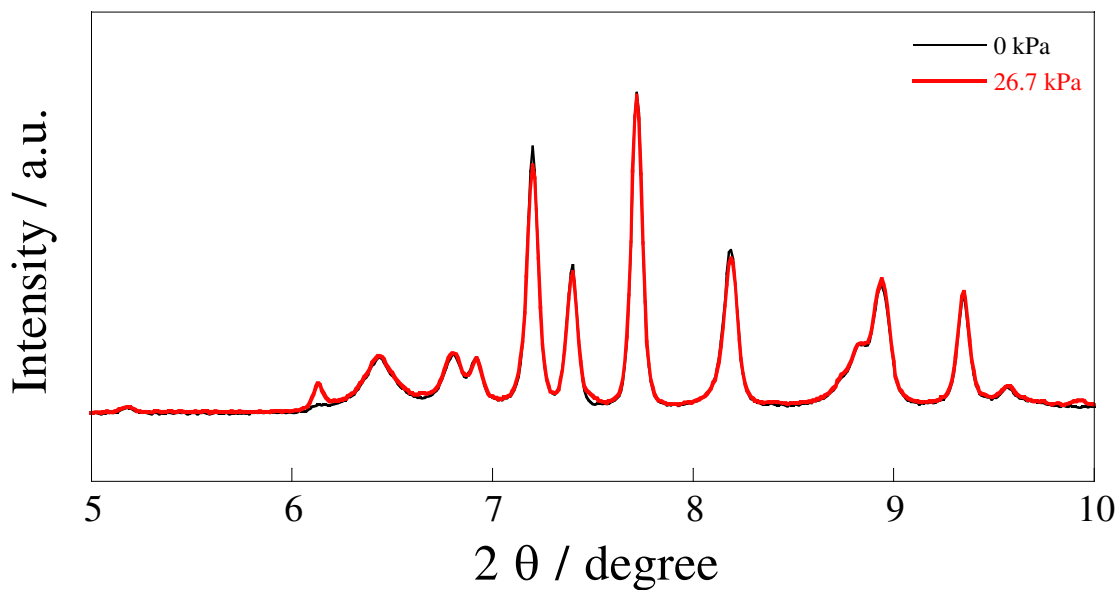

Figure 3S. In situ XRD patterns of ELM-11 at 273 K with loading CO<sub>2</sub> gas in the pressure range from 0 to 66.7 kPa. (a) 2θ of 5 – 40 degree, (b) 5 – 10 degree, and (c) 5 – 10 degree (Black: 0 kPa, Green: 13.3 kPa, Red: 26.7 kPa, Orange: 33.3 kPa, Blue: 40.0 kPa, Light blue: 66.7 kPa.). The gate adsorption pressure is 31 kPa.

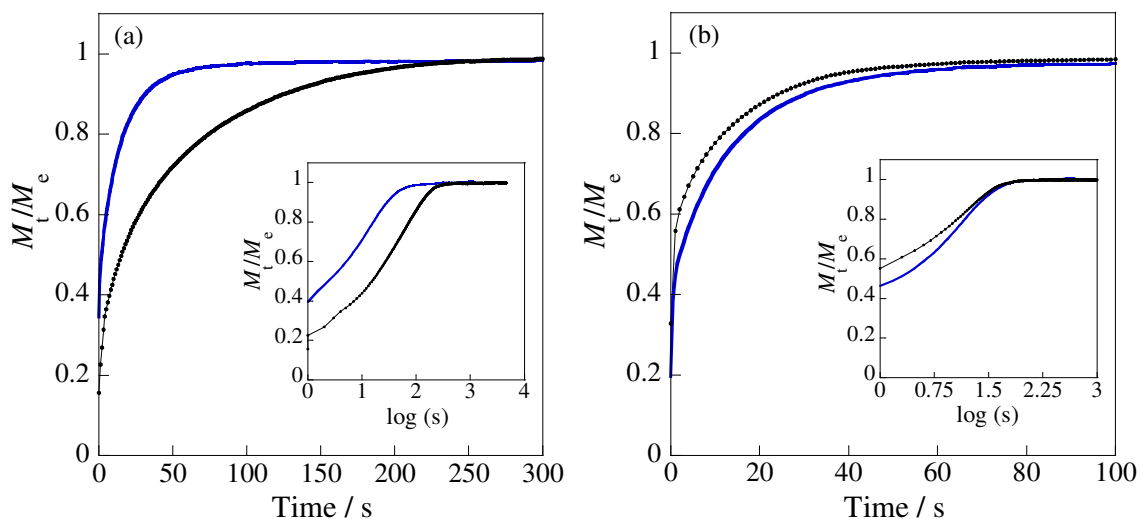

Figure 4S. Variation of  $M_t/M_e$  against time of ELM-11 (Black) and Zeolite 5A (Blue) (a) at 303 K and (b) 273 K. Inset: Variation of  $M_t/M_e$  against logarithm of time.

(a)

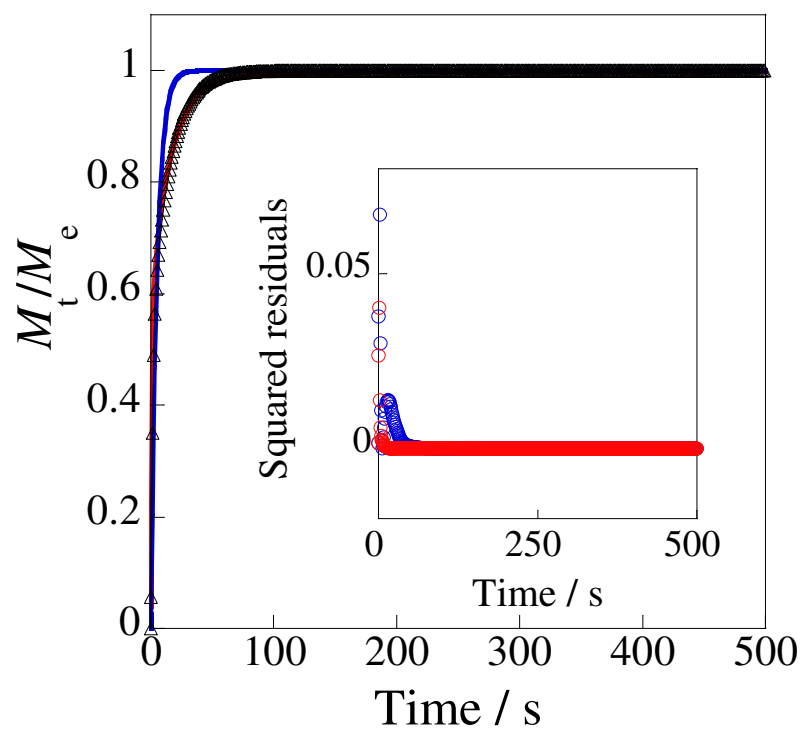

(b)

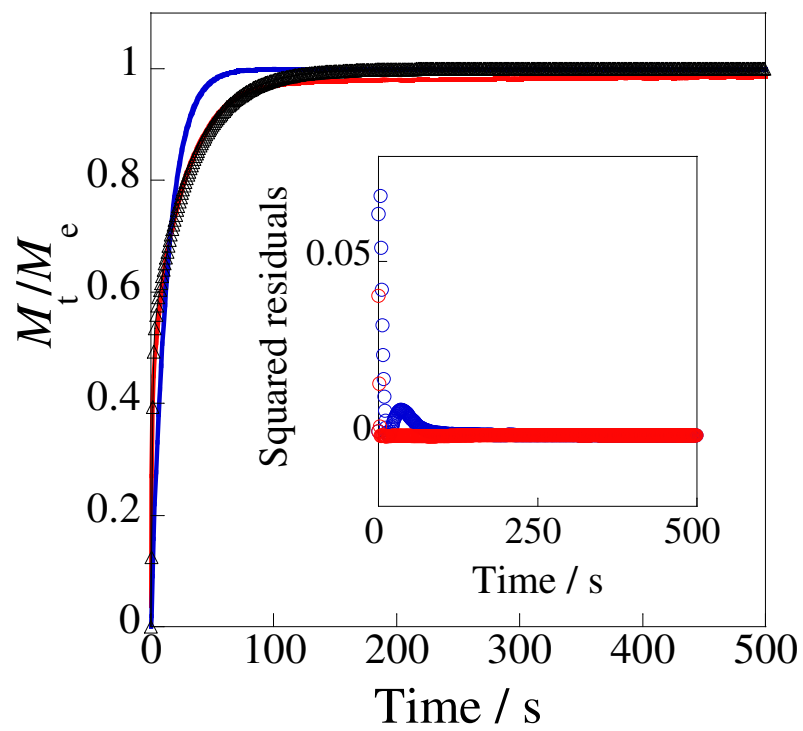

(c)

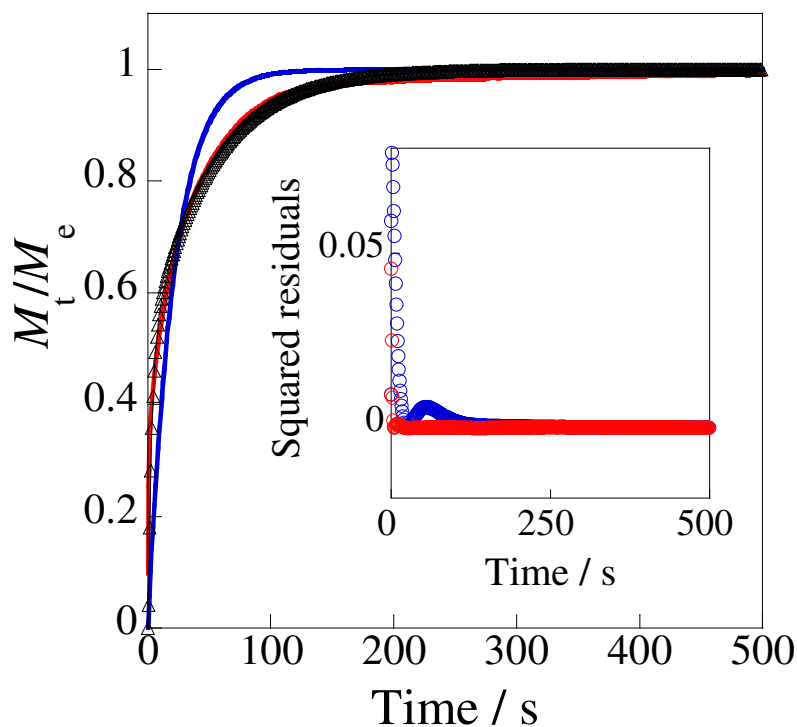

Figure 5S. Fitting results of CO<sub>2</sub> adsorption kinetics on ELM-11 at (a) 273 K, (b) 293 K, and (c) 298 K. Black: Experiment, red: Double exponential model, blue: Linear driving force model. Inset: Squared residuals against time.

Table 1S. Kinetics rate constants estimated by fitting the adsorption kinetic profiles to double exponential model and linear driving force model.

|                 | Double Exponential model |         | Linear Driving Force model |
|-----------------|--------------------------|---------|----------------------------|
| Temperature (K) | $k_1$                    | $k_2$   | $k$                        |
| 273             | 0.87715                  | 0.06860 | 0.16676                    |
| 293             | 0.57312                  | 0.03105 | 0.07168                    |
| 298             | 0.32516                  | 0.02041 | 0.04540                    |
| 303             | 0.13923                  | 0.01220 | 0.02576                    |

Complete reference of 23

(23) Kondo, A.; Kajiro, H.; Noguchi, H.; Carlucci, L.; Proserpio, D. M.; Ciani, G.; Kato, K.; Takata, M.; Seki, H.; Sakamoto, M.; Hattori, Y.; Okino, F.; Maeda, K.; Ohba, T.; Kaneko, K.; Kanoh, H. *J. Am. Chem. Soc.* **2011**, *133*, 10512-10522.
